# Supplementary material for: On-board error correction improves IR earth sensor accuracy
Source: PeerJ journal article supplement (doi:10.7717/peerj.2271), 1989-10-01
Supplement: Vegemite_GC.zip [file Vegemite_GC.zip]

Software Version : 6.3.2.0646  
Reprocess Number : uqchem-gcms: 3942  
Sample Name :  
Instrument Name : 680GC  
Rack/Vial : 0/0  
Sample Amount : 1.000000  
Cycle : 1

Date : 9/10/2015 12:45:45 PM  
Data Acquisition Time : 9/10/2015 12:43:05 PM  
Channel : B  
Operator : manager  
Dilution Factor : 1.000000

Result File : c:\users\luq chem\desktop\fid run tcws 6.3.2\data\Vegemite 100915 formaldehyde.rst  
Sequence File : C:\Users\UQ Chem\Desktop\FID RUN TCWS 6.3.2\Sequence\Beer ethanol HS\_2.seq

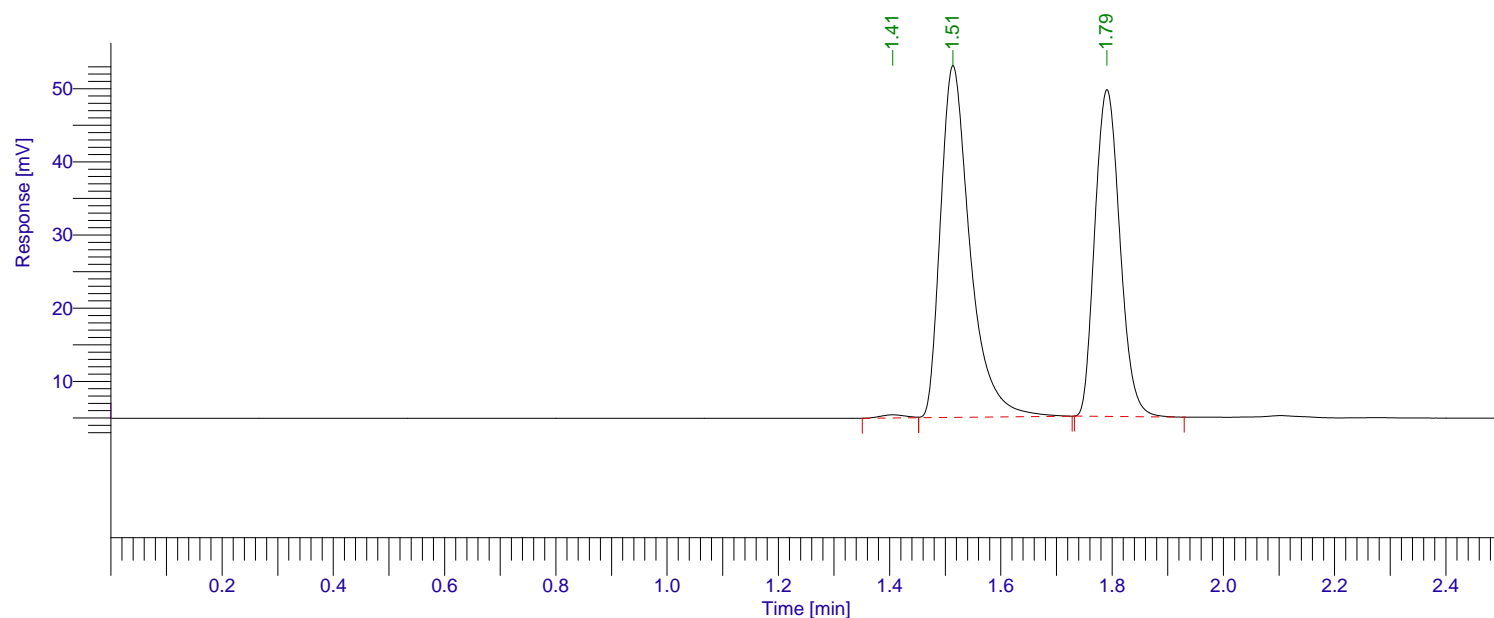

## DEFAULT REPORT

| Peak # | Component Name | Time [min] | Area [ $\mu\text{V}\cdot\text{s}$ ] | Height [ $\mu\text{V}$ ] |
|--------|----------------|------------|-------------------------------------|--------------------------|
| 1      |                | 1.405      | 1315.73                             | 426.58                   |
| 2      |                | 1.514      | 177112.48                           | 48096.65                 |
| 3      |                | 1.790      | 139524.15                           | 44666.85                 |
|        |                |            | 317952.36                           | 93190.08                 |
