# Supplementary material for: On-board error correction improves IR earth sensor accuracy
Source: PeerJ journal article supplement (doi:10.7717/peerj.2271), 1989-10-01
Supplement: Vegemite_GC.zip [file Vegemite_GC.zip]

Software Version : 6.3.2.0646  
Reprocess Number : uqchem-gcms: 3932  
Sample Name :  
Instrument Name : 680GC  
Rack/Vial : 0/0  
Sample Amount : 1.000000  
Cycle : 20

Date : 9/10/2015 12:07:40 PM  
Data Acquisition Time : 9/10/2015 12:04:57 PM  
Channel : B  
Operator : manager  
Dilution Factor : 1.000000

Result File : c:\users\uq chem\desktop\fid run tcws 6.3.2\data\Vegemite 100915 020.rst  
Sequence File : C:\Users\UQ Chem\Desktop\FID RUN TCWS 6.3.2\Sequence\Beer ethanol HS.seq

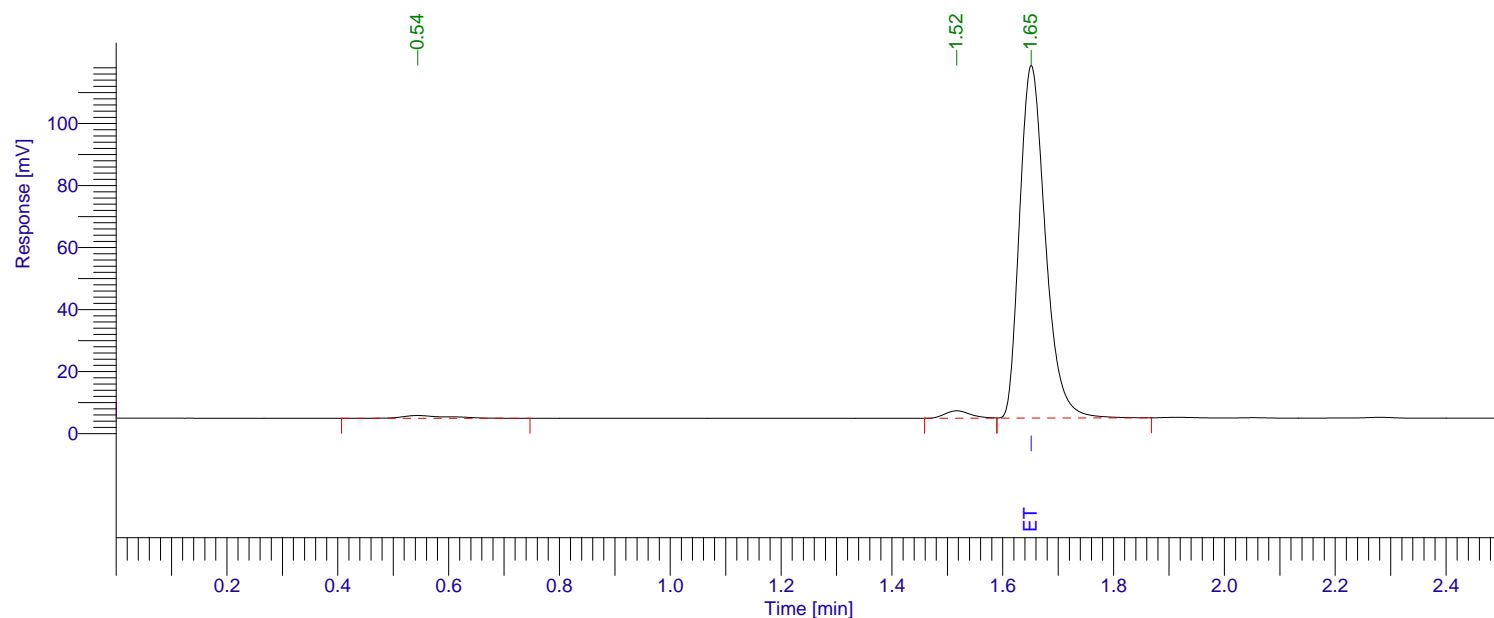

## DEFAULT REPORT

| Peak # | Component Name | Time [min] | Area [ $\mu\text{V}\cdot\text{s}$ ] | Height [ $\mu\text{V}$ ] |
|--------|----------------|------------|-------------------------------------|--------------------------|
| 1      |                | 0.544      | 4796.88                             | 888.69                   |
| 2      |                | 1.517      | 7541.67                             | 2386.05                  |
| 3      | ETHANOL        | 1.651      | 366579.30                           | 113763.48                |
|        |                |            | 378917.85                           | 117038.21                |
